# Supplementary material for: Global and regional phosphorus budgets in agricultural systems and their implications for phosphorus-use efficiency
Source: Copernicus journal article supplement (doi:10.5194/essd-10-1-2018), 2018-01-08
Supplement: Supplementary file 1 [file essd-10-1-2018-supplement.pdf]

Supplement of Earth Syst. Sci. Data, 10, 1–18, 2018  
<https://doi.org/10.5194/essd-10-1-2018-supplement>  
© Author(s) 2018. This work is distributed under  
the Creative Commons Attribution 3.0 License.

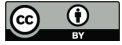

Open Access  
Earth System  
Science  
Data

*Supplement of*

## **Global and regional phosphorus budgets in agricultural systems and their implications for phosphorus-use efficiency**

**Fei Lun et al.**

*Correspondence to:* Junguo Liu ([liujg@sustc.edu.cn](mailto:liujg@sustc.edu.cn), [junguo.liu@gmail.com](mailto:junguo.liu@gmail.com))

The copyright of individual parts of the supplement might differ from the CC BY 3.0 License.

## Supporting Information

### 1. Global P budgets in agricultural systems and their implications for phosphorus-use efficiency

Our study concentrated on global and regional P budgets in agriculture and their phosphorus-use efficiency (PUE) in four main agricultural subsystems: cropland, managed grassland (hereafter, pasture), livestock, and humans. The specific P pools in this study were phosphate rock, phosphates produced from that rock, the atmosphere, pasture, livestock, cropland, harvested crops, humans, and the environment. The inputs and outputs for each P pool are described below.

#### 1.1 Phosphate Rock

As a non-renewable resource, phosphate rock is the main source for most of the P that humans use (Liu *et al.*, 2008). Mined phosphate rock is processed into phosphates (section 1.2) for subsequent use. Data for the annual quantities of mined phosphates were obtained from the International Fertilizer Industry Association (IFA; <http://www.fertilizer.org/Statistics>), which provided the data for global and regional levels (expressed as the P<sub>2</sub>O<sub>5</sub> equivalent). The annual amount of P that is mined can be calculated from the proportion of the P in the P<sub>2</sub>O<sub>5</sub> equivalent.

#### 1.2 Phosphates

The P in phosphates is used in phosphate fertilizer, feed additives, detergents, and other uses. The Food and Agriculture Organization (FAO; <http://www.fao.org/faostat/en/#home>) provides the annual consumption of phosphate fertilizer for each country. Some of the phosphate fertilizer is applied to pasture in some

23 countries (mainly in Europe), and FAO (2002) estimated the consumption of phosphate  
24 fertilizer by cropland and pasture in each country. Thus, from this information, we can  
25 estimate the amounts of phosphate fertilizer applied to cropland and pasture. In addition,  
26 8% of the global mined phosphate is used in feed additives, and the remainder of the  
27 phosphate is used in detergents or other uses for humans (Ringeval *et al.*, 2014).

### 28 **1.3 Atmosphere**

29 The P input from the atmosphere refers to the atmospheric P deposition in cropland  
30 and pasture areas, whereas anthropogenic P outputs comes from the burning of crop  
31 residues and bioenergy within the agricultural system. All these inputs and outputs were  
32 estimated by using the PKU-FUEL model (Wang *et al.*, 2014, 2015). Wang *et al.* (2014)  
33 used the global 3D atmospheric transport model LMDz-INCA to simulate the transport  
34 and deposition of aerosols from different sources, with specific reference to the P  
35 concentration. The modeled P deposition maps agreed well with P deposition observed  
36 at 121 stations worldwide (Wang *et al.*, 2015).

### 37 **1.4 Cropland and harvested crops**

38 In addition to application of phosphate fertilizer and atmospheric P deposition,  
39 cropland P inputs also come from livestock manure and human excreta (as sewage  
40 sludge), as well as recycled crop residues. Cropland P outputs include P removals in  
41 harvested biomass (crops and crop residues) and P output by leaching or erosion.

#### 42 **1.4.1 Cropland P inputs**

43 The application of phosphate fertilizer and atmospheric deposition have been  
44 presented above. Manure P inputs from livestock and humans are described in sections

45 1.4.5 and 1.4.6, whereas P in recycled crop residues is presented in section 1.4.2.

#### 46 1.4.2 Cropland P outputs

47 Crops are the economically valuable outputs of cropland. FAO provided data for  
48 the 224 (Table SI-1) countries for the production of 178 crops (Table SI-2) that we  
49 included in our analysis. We grouped these crops into 13 types: wheat, rice, maize, other  
50 cereals, soybeans, palm oils, other oil crops, sugar crops, fibers, roots and tubers,  
51 vegetables, fruit, and other crops. The distributions of the harvested crops were also  
52 obtained from FAOSTAT, including crops that produced human food, livestock feed,  
53 industrial processing, wastes, and other uses. Feed crops flow directly into the livestock  
54 subsystem, and the remaining crops flow into the human subsystem. P in harvested  
55 crops can be estimated by multiplying their biomass production by their P content  
56 (COMIFER, 2007; USDA-NRCS, 2009; Waller, 2010). In addition, crop residues are  
57 also important for P removal from cropland. Half of the crop residues are returned to  
58 cropland, and 25% are used as livestock fodder (Liu *et al.*, 2008). Of the remaining 25%  
59 of crop residues, some proportion is burned, and can be estimated by the PKU-FUEL  
60 model, and the remainder is transferred to the human subsystem. FAOSTAT provides  
61 the amount of crop residues that are recycled to cropland, so we can estimate P in these  
62 crop residues by multiplying the amount of residues by the corresponding P content.  
63 Based on the distribution of crop residues, we can estimate the P flows in harvested  
64 crop residues. The global P loss from leaching and runoff was estimated by Bouwman  
65 *et al.* (2013), who noted that these losses account for approximately 12.5% of the total  
66 P inputs in agricultural land. Thus, we used 12.5% of all P inputs in agricultural land to

67 represent the leaching and runoff loss of P.

#### 68 1.4.3 Cropland soil P budget

69 The cropland soil P budget ( $\Delta P$ ) refers to the balance between all P inputs and all  
70 P outputs for cropland.

#### 71 1.4.4 Pasture

72 For pasture, the P inputs are from livestock manure, phosphate fertilizer, and  
73 atmospheric deposition. Harvested grass is the economically valuable product removed  
74 from pasture, but leaching also results in a P loss from pasture. The data on production  
75 of grass as livestock feed was obtained from Herrero *et al.* (2013) and ORCHIDEE-  
76 GM (Chang *et al.*, 2013, 2015). The P content of the grass was estimated at 0.19 to  
77 0.56% of its biomass (Antikainen *et al.*, 2005; COMIFER, 2007; USDA-NRCS, 2009;  
78 Waller, 2010); we chose the midpoint of this range (0.38%) as the P content of grass in  
79 our study. Based on this P content, we estimated the P content in harvested grass. The  
80 pasture P budget ( $\Delta P$ ) was then estimated as the balance between its total P inputs and  
81 total P outputs.

#### 82 1.4.5 Livestock

83 The stock of P in livestock does not change substantially over time, so we assumed  
84 that livestock P inputs equaled livestock P outputs.

85 Livestock P outputs include P in livestock economic products (meat, eggs, and  
86 milk) and P in manure (Table SI-3). FAOSTAT provided the data for the production of  
87 meat, eggs, and milk for 16 types of animals. We used the P contents of meat, eggs, and  
88 milk from Grote *et al.* (2005) to estimate the P stocks in the livestock products.

89 FAOSTAT estimated the amount of nitrogen in manure, as well as its distribution to  
90 pasture, to cropland as manure, and to the environment as waste. Thus, using P:N ratios  
91 for manure of different animals (MWPS-18, 1985; OECD Secretariat, 1991; Levington  
92 Agriculture, 1997; Sheldrick *et al.*, 2003; ASAE, 2005), we estimated the P flows in  
93 livestock manure.

94 Livestock P inputs include grass from pasture, crops, and crop residues from  
95 cropland, as well as feed additives from phosphate and processed feed from wasted  
96 human food. Therefore, the P in the feed processed from human food can be calculated  
97 by subtracting the other P inputs from the livestock total P outputs.

#### 98 1.4.6 Humans

99 As in the analysis for livestock, we assumed that total P inputs equal total P outputs  
100 for humans. All inputs have been described above. Human P outputs consist of food  
101 processed to provide livestock feed, transfer of excreta to cropland as sewage sludge,  
102 biomass combustion for energy, and wastes released into the environment. The total  
103 amount of P in human excreta can be estimated by multiplying the human population  
104 by the per capita annual amount of P in human excreta (Smil, 2000; Cordell *et al.*, 2009).  
105 Liu *et al.* (2008) reported that 30% of human excreta in urban areas and 70% of human  
106 excreta in rural areas is currently recycled to cropland. Thus, based on these proportions,  
107 we can calculate the amount of P in human manure that is contributed to cropland. The  
108 total amount of P released into the environment as waste can be estimated by subtracting  
109 the other human P outputs from the total human P inputs.

#### 110 1.4.7 Environment

111 The P inputs to the environment include P leaching or runoff from agricultural  
112 soils and P flows into the environment as waste from humans. These values are  
113 described earlier in this section.

114 For the methods described in the following sections, details of the components of  
115 the equations are presented in Table SI-4.

## 116 **2. Annual P budgets of cropland and pasture soils**

117 Annual changes in soil P (the soil P budget,  $\Delta P$ ) are calculated as the differences  
118 between annual inputs and outputs:

$$119 \Delta P_{cropland} = (P_{fer-crop} + P_{dep-crop} + P_{man-crop} + P_{slu-crop} + P_{res-rec} + P_{crop-seed}) - (P_{crop} + P_{crop-res} + P_{runoff-crop})$$

120 (Eq. 1)

$$121 \Delta P_{pasture} = (P_{fer-pas} + P_{dep-pas} + P_{man-pas}) - (P_{grass} + P_{unoff-pas}) \quad (\text{Eq. 2})$$

122 where  $\Delta P_{cropland}$  and  $\Delta P_{pasture}$  are annual soil budgets for cropland and pasture,  
123 respectively;  $P_{fer-crop}$  and  $P_{fer-pas}$  are the corresponding phosphate fertilizer applications;  
124  $P_{dep-crop}$  and  $P_{dep-pas}$  are the corresponding atmospheric P deposition fluxes; and  $P_{man-crop}$   
125 and  $P_{man-pas}$  are the corresponding livestock manure fluxes applied to cropland and  
126 pasture.  $P_{slu-crop}$  is the input as human sewage sludge, which is only applied to cropland;  
127  $P_{res-rec}$  is the input of P from recycled crop residues returned to cropland;  $P_{crop-seed}$  is the  
128 P in seeds;  $P_{crop}$  and  $P_{crop-res}$  are P removals in harvested crop biomass and crop residues,  
129 respectively;  $P_{grass}$  is the P removed in the intake of grass by animals; and  $P_{runoff-crop}$  and  
130  $P_{runoff-pas}$  are losses of dissolved and particulate P to bodies of water from cropland and  
131 pasture, respectively. All units for these fluxes are in kg P ha<sup>-1</sup> yr<sup>-1</sup> or Tg P yr<sup>-1</sup>,  
132 depending on the area or period they describe.

### 133 3. Annual P budgets of cropland and pasture soils

134 We defined the annual labile P inputs ( $P_{\text{labile-input}}$ ) and stable P inputs ( $P_{\text{stable-input}}$ ) as:

$$135 P_{\text{labile-input}} = 0.8 \cdot P_{\text{Inputs}} \quad (\text{Eq. 3})$$

$$136 P_{\text{stable-input}} = 0.2 \cdot P_{\text{Inputs}} \quad (\text{Eq. 4})$$

137 where  $P_{\text{inputs}}$  represents the sum of all input fluxes in the first term on the right side of  
138 Eq. 1, excluding  $P_{\text{crop-seed}}$ . If  $P_{\text{labile-input}} \geq P_{\text{removal}}$ , with  $P_{\text{removal}}$  being the sum of  
139 removals as  $P_{\text{crop}}$ ,  $P_{\text{crop-res}}$ , and  $P_{\text{runoff-crop}}$  for cropland and the sum of removals as  $P_{\text{pasture}}$   
140 and  $P_{\text{runoff-pasture}}$  for pasture, the surplus labile P input is transferred to the stable P pool  
141 at the end of each year. Given the stable P losses by leaching or runoff ( $P_{\text{runoff}}$ ), the soil  
142 P export and the budget of the stable soil P pool are given by:

$$143 P_{\text{soil-exp}} = P_{\text{runoff}} \quad (\text{Eq. 5})$$

$$144 \Delta P_{\text{stable}} = P_{\text{stable-input}} + P_{\text{labile-input}} - P_{\text{removal}} - P_{\text{runoff}} \quad (\text{Eq. 6})$$

145 If  $P_{\text{labile-input}} < P_{\text{removal}}$ , there is no transfer of labile P into the stable P pool, but the  
146 extra P demand for crop biomass is satisfied by a transfer from the pool of stable P.  
147 In this case, the soil P balance includes P lost by leaching or runoff into bodies of  
148 water and the surplus labile P is incorporated in crop biomass from the stable P pool:

$$149 P_{\text{soil-exp}} = P_{\text{runoff}} + (P_{\text{removal}} + P_{\text{labile-input}}) \quad (\text{Eq. 7})$$

150 Thus, the net annual soil-P budget can be estimated by:

$$151 \Delta P = \Delta P_{\text{stable}} + P_{\text{seed}} \quad (\text{Eq. 8})$$

### 152 4. Human and livestock P budgets

153 We assumed that the stocks of P in living livestock, in livestock products, and in  
154 human bodies were constant over time. Total annual P inputs for humans and livestock



155 must then equal their P outputs each year, which defines the mass-balance equations for  
156 these two subsystems:

$$157 \quad P_{grass} + P_{feed-add} + P_{pro-feed} + P_{crop-feed} + P_{res-add} = P_{man} + P_{meat} + P_{egg} + P_{milk} \quad (\text{Eq. 9})$$

$$158 \quad P_{crop-hum} + P_{res-add} + P_{meat} + P_{egg} + P_{milk} + P_{other} = P_{pro-feed} + P_{bioenergy} + P_{hum-env} + P_{slu-crop}$$

159 (Eq. 10)

160 where  $P_{meat}$ ,  $P_{egg}$ , and  $P_{milk}$  are the P fluxes associated with meat, eggs, and milk  
161 consumed by humans, respectively, and  $P_{grass}$ ,  $P_{feed-add}$ ,  $P_{crop-feed}$ ,  $P_{res-feed}$ , and  $P_{pro-feed}$   
162 represent the ingestion of P by animals from grazed grass biomass, feed additives, crop  
163 biomass and residue feed, and feed from food not consumed by humans (see Fig. 1);  
164  $P_{man}$  is the total flux of P rejected by animals in the form of manure delivered to both  
165 cropland and pasture;  $P_{crop-hum}$  defines the P input to humans from cropland, and  
166 represents the consumption of crop products;  $P_{cropres-hum}$  represents the P flux in crop  
167 residues used by humans to generate bioenergy;  $P_{other}$  represents the P input flux to  
168 humans directly from minerals (detergents and other non-fertilizer products);  $P_{bioene}$  is  
169 P lost from humans to the environment from the use of biofuels harvested from crops  
170 (thus, not including wood bioenergy);  $P_{slu-crop}$  is the input as human sewage sludge,  
171 which is only applied to cropland; and  $P_{hum-env}$  is the remainder of the P flux lost in  
172 human sewage, calculated as the amount that remains after accounting for the other  
173 terms.

## 174 5. Phosphorus-use efficiencies

175 The PUE of cropland ( $\epsilon_{cropland}$ ), pasture ( $\epsilon_{pasture}$ ), and livestock ( $\epsilon_{livestock}$ ) is defined  
176 as:

177 
$$\mathcal{E}_{cropland} = \frac{P_{crop}}{P_{fer-crop} + P_{man-crop} + P_{slu-crop} + P_{dep-crop}} \quad (\text{Eq. 11})$$

178 
$$\mathcal{E}_{pasture} = \frac{P_{grass}}{P_{fer-pas} + P_{man-pas} + P_{dep-pas}} \quad (\text{Eq. 12})$$

179 
$$\mathcal{E}_{livestock} = \frac{P_{meat} + P_{egg} + P_{milk}}{P_{grass} + P_{feed-add} + P_{crop-feed} + P_{res-feed} + P_{pro-feed}} \quad (\text{Eq. 13})$$

180 We defined the PUE of human food ( $\mathcal{E}_{food}$ ) as the ratio of P in human excreta to the  
 181 total of all P inputs in human food. This represents an exception to our definition, since  
 182 human excreta have no economic value.

183 
$$\mathcal{E}_{food} = \frac{P_{excreta-hum}}{P_{crop-food} + P_{meat} + P_{egg} + P_{milk}} \quad (\text{Eq. 14})$$

184 Finally, we defined the P yield of livestock products per unit area of pasture ( $YP_{lp-pasture}$   
 185 pasture) as:

186 
$$YP_{lp-pasture} = \frac{P_{meat} + P_{egg} + P_{milk}}{A_{pasture}} \times \frac{P_{grass}}{P_{liv-input}} \quad (\text{Eq. 15})$$

187 where  $A_{pasture}$  is the area of pasture in a given region and  $P_{liv-input}$  refers to all  
 188 livestock P inputs, including grazed grass from pasture, crops used as feed, and animal  
 189 feed additives from phosphates given by humans to livestock.

## 190 **6. International trade dependency ratio**

191 The P fluxes associated with the international trade of fertilizers, food, feed, and  
 192 fiber commodities can also be associated with dependency ratios. The fertilizer import  
 193 P-dependency ratio ( $F_{fer}$ ) is expressed as the ratio of P in imported fertilizers ( $P_{fer-imp}$ )  
 194 to P in all fertilizers ( $P_{fer-con}$ ) consumed by a country:

195 
$$F_{fer} = \frac{P_{fer-imp}}{P_{fer-con}} \quad (\text{Eq. 16})$$

196 The food import dependency ratio ( $F_{\text{food}}$ ) is expressed as the ratio of P in food imports  
197 ( $P_{\text{food-imp}}$ ) to P in all food consumed in one country:

$$198 \quad F_{\text{food}} = \frac{P_{\text{food-imp}}}{P_{\text{food-pro}} + P_{\text{food-imp}} - P_{\text{food-exp}}} \quad (\text{Eq. 17})$$

199 The proportion of imports ( $F_{\text{total}}$ ) is expressed as the ratio of total P imported as  
200 fertilizers and food to the total P in fertilizers and food:

$$201 \quad F_{\text{total}} = \frac{P_{\text{fer-imp}} + P_{\text{food-imp}}}{P_{\text{fer-con}} + P_{\text{food-pro}} + P_{\text{food-imp}} - P_{\text{food-exp}}} \quad (\text{Eq. 18})$$

## 202 **7. Comparisons at a national level**

203 We estimated the flows of P in traded food and fertilizer for the United States, for  
204 China, for Australia and France, and for Japan from in 2010 (Fig SI-1). We chose these  
205 countries because they were representative of the combinations of fertilizer exporter or  
206 importer with food exporter or importer. We then compared our results with those in  
207 previous reports.

### 208 **7.1 United States**

209 The United States is an important exporter of food and phosphate fertilizer. Suh  
210 and Yee (2011) reported a net P export in food of 413 Gg P in 2007, which is slightly  
211 lower than the value of 435 Gg P in 2010 in our study. They estimated the net export of  
212 phosphate fertilizer as 1291 Gg P in 2007, which is slightly higher than the value of  
213 1196 Gg P in 2010 in our study. The net export of food increased slightly from 2002 to  
214 2010, whereas exports of phosphate fertilizer have decreased.

### 215 **7.2 China**

216 Chinese food imports have been increasing due to population growth and dietary

217 changes in China, especially in recent years, and food security is therefore a potentially  
218 serious problem in China. The trade in phosphate fertilizer changed greatly during the  
219 study period. Before 2007, China depended strongly on imported phosphate fertilizer,  
220 with a decreasing trend. However, China became a large exporter of phosphate fertilizer  
221 after 2007, with the exports increasing thereafter. If this trend continues, a P scarcity  
222 could develop in China. Our results indicated that the soil P accumulation in wheat  
223 cropland ( $29.4 \text{ kg P ha yr}^{-1}$ ) was higher than the national level of  $25.42 \text{ kg P ha yr}^{-1}$ .  
224 However, the accumulation of P in rice and maize fields was lower than the national  
225 average (Ma *et al.*, 2011).

### 226 **7.3 Australia and France**

227 Australia and France both have relatively stable food exports, with about  $100 \text{ Tg P}$   
228  $\text{yr}^{-1}$  stored in food. Both countries import phosphate fertilizer, but at decreasing rates.  
229 Both countries are main crop exporters. Senthilkumar *et al.* (2012) reported that France  
230 imported  $113 \text{ Gg P yr}^{-1}$  in crops and feed and  $318 \text{ Gg P yr}^{-1}$  of phosphate fertilizer from  
231 2002 to 2006, compared with  $26 \text{ Gg P yr}^{-1}$  in food and feed and  $271.4 \text{ Gg P yr}^{-1}$  in  
232 fertilizer in our study. France also exported  $133 \text{ Gg P yr}^{-1}$  in food and feed and  $29.8 \text{ Gg}$   
233  $\text{P yr}^{-1}$  in phosphate fertilizer during the same period, compared with  $122$  and  $25.4 \text{ Gg P}$   
234  $\text{yr}^{-1}$ , respectively, in our study. The main differences may be because we did not account  
235 for the international trade of grass feed. Cordell *et al.* (2013) reported that Australia  
236 imported a net amount of  $115 \text{ Gg P yr}^{-1}$  of phosphate fertilizer and exported a net  
237 amount of  $106 \text{ Gg yr}^{-1}$  in crops, compared with  $102$  and  $45 \text{ Gg yr}^{-1}$ , respectively in our  
238 study.

#### 239        **7.4 Japan**

240        Japan depends strongly on imported food and phosphate fertilizer from other  
241 countries. P in the imported food remained steady at around 110 Gg P yr<sup>-1</sup> in Japan.  
242 Although most of the applied phosphate fertilizer was obtained from other countries,  
243 Japan's cropland PUE was low, leading to a serious problem of soil P accumulation in  
244 cropland. Because the government is aware of the problem, they have made an effort to  
245 increase cropland PUE, which increased from 15.7% in 1985 to 20.1% in 2005  
246 (Mishima *et al.*, 2010). This is close to our result (20% in 2002 to 23% in 2010); thus,  
247 the net imports of phosphate fertilizer have decreased in Japan.

#### 248        **8. Comparisons of PUE**

249        We defined PUE as the ratio of the economic P outputs to the total P inputs.  
250 Because the economic output differs among commodities, PUE is unique to each  
251 commodity. Table SI-6 presents the values for cropland as a whole, by region and  
252 globally, and Table SI-7 presents the values for individual crops. For pasture, the harvest  
253 P output equals the total P output, and does not account for loss of soil P by leaching or  
254 runoff into bodies of water. For cropland, P in the harvested crops was defined as the  
255 economic P output, excluding the P in crop residues. For livestock, the economic P  
256 outputs only include P embodied in livestock products. However, some portion of the  
257 livestock manure is accounted for as P inputs to cropland and pasture. We calculated  
258 PUE as follows:

259        **Cropland total PUE:** the ratio of P outputs in harvested crops and crop residues  
260 to total P inputs into cropland

261 **Cropland PUE:** the ratio of P outputs in harvested crops to total P inputs into  
262 cropland (i.e., excluding crop residues)

263 Figure SI-2 presents the relationship between cropland total PUE and cropland  
264 PUE.

265 **Livestock total PUE:** the ratio of P outputs in livestock products and in the  
266 recycled manure transferred to cropland and pasture to the total P inputs into livestock

267 **Livestock PUE:** the ratio of P outputs in livestock products to the total P inputs  
268 into livestock (i.e., excluding recycled manure)

### 269 **8.1 Cropland PUE**

270 Cropland total PUE had a strong and significant linear relationship with cropland  
271 PUE (Fig. SI-2). Global cropland total PUE was estimated to be 0.76, which was 1.65  
272 times the global cropland PUE (excluding crop residues) of 0.46. However, with  
273 different crop harvest index values, cropland total PUEs and PUEs (excluding residues)  
274 differed among the regions (Table SI-6). The ratio of cropland total PUE to cropland  
275 PUE was relatively high in Southern and Southeastern Asia, northern Africa, and North  
276 America, and was relatively low in the Caribbean and Central America and South  
277 America. The cropland PUE was 0.67 when the cropland soil P balance was neutral  
278 because parts of the P output (i.e., the residues) are not considered. There was more  
279 recycling of P than loss of P in surface runoff into bodies of water. Thus, cropland total  
280 PUE should be more than 1 when the cropland soil P balance is neutral.

281 Substantial differences in PUE and total PUE occurred among crops because of  
282 their different harvest indices, yields, and external P inputs (Table SI-7). Oil palm, fiber,

283 fruits, and vegetable crops had very low total PUE, and therefore a low total PUE to  
284 PUE ratio ( $<1.2$ ) because few of their P inputs flowed into their crop biomass. In  
285 contrast, the remaining crop types (excluding the “other” category) had high total PUE  
286 because more of their P was transferred into the crop and crop residues, leading to a  
287 high total PUE to PUE ratio ( $>1.3$ ). Furthermore, P inputs did not meet the P demand  
288 for wheat and other cereals. However, due to their low harvest index, cereals produced  
289 a large amount of crop residues; hence, their PUE was much lower than their total PUE,  
290 especially for rice and maize. For the “other” category, there was no difference between  
291 PUE and total PUE because there was little production of residues.

292       Based on the available data, it was not possible to determine the source of the  
293 cropland P (i.e., manure or mineral fertilizer) that was lost into bodies of water. Thus,  
294 it is hard to define a PUE term that accounts for the impacts of different fertilizer types.  
295 Since this is an important problem for managing P inputs and outputs in agricultural  
296 ecosystems, further research will be necessary to clarify the relationships between  
297 cropland total PUE and PUE for different crops, and how they are affected by human  
298 and natural factors.

## 299       **8.2 Livestock PUE**

300       Because livestock total PUE includes P in recycled manure, its global value (0.83)  
301 was far higher than the global livestock PUE (excluding manure) of 0.06 (Table SI-6).  
302 These two PUE parameters differed greatly among the regions due to differences in the  
303 mixture and quantity of different livestock species, different livestock husbandry  
304 methods, and different manure management methods. The yield of livestock products

305 was very low in African countries, resulting in low livestock PUE. However, almost all  
306 their manure was applied to agricultural land as an important P input, leading to much  
307 higher livestock total PUE ( $\geq 0.92$ ) than in other regions. Therefore, it will be necessary  
308 for African countries to find ways to increase the economic value of livestock outputs  
309 while continuing to use manure efficiently to relieve the pressure on global sources of  
310 phosphates. In contrast, efficient livestock husbandry allowed a higher proportion of P  
311 inputs to flow into livestock products in Eastern Asia and Europe ( $\geq 9.9\%$ ) than in Africa  
312 ( $< 2\%$ ). However, as the application of phosphate fertilizer increased, the proportion of  
313 livestock manure recycled into agricultural soils decreased. Consequently, livestock  
314 total PUE was relatively low in Eastern Asia and Europe; this represents a waste of the  
315 livestock manure resource and excessive application of phosphate fertilizer. Therefore,  
316 countries in Eastern Asia and Europe should look for ways to increase their use of  
317 livestock manure.

318



319 **References**

- 320 Antikainen R, Lemola R, Nousiainen J *et al.* (2005) Stocks and flows of nitrogen and  
321 phosphorus in the Finnish food production and consumption system.  
322 *Agriculture, Ecosystems and Environment*, **107**, 287-305.
- 323 ASAE (2005) Manure production and characteristics. Report D384.2, American  
324 Society of Agricultural Engineers, St. Joseph, MI, USA.
- 325 Bouwman L, Goldewijk KK, Van Der Hoek KW *et al.* (2013) Exploring global changes  
326 in nitrogen and phosphorus cycles in agriculture induced by livestock production  
327 over the 1900-2500 period. *Proceedings of the National Academy of Sciences of*  
328 *the United States of America*, **110**, 20882-20887.
- 329 Chang J, Viovy N, Vuichard N *et al.* (2013) Incorporating grassland management in  
330 ORCHIDEE: model description and evaluation at 11 eddy-covariance sites in  
331 Europe. *Geoscience Model Development*, **6**, 2165–2181.
- 332 Chang JF, Viovy N, Vuichard N *et al.* (2015) Modeled changes in potential grassland  
333 productivity and in ruminant livestock density in Europe over 1961-2010. *PLOS*  
334 *ONE*, **10**, e0127554, doi: 10.1371/journal.pone.0127554.
- 335 COMIFER (2007) Teneur en P, K et Mg des organes végétaux récoltés pour les cultures  
336 de plein champ et les principaux fourrages. Comité Français d'Étude et de  
337 Développement de la Fertilisation Raisonné, Paris. (in French)
- 338 Cordell D, Drangert J, White S (2009) The story of phosphorus: global food security  
339 and food for thought. *Global Environmental Change*, **19**, 292-305.
- 340 Cordell D, Jackson M, White S (2013) Phosphorus flows through the Australian food

341 system: identifying intervention points as a roadmap to phosphorus security.  
342 *Environmental Science & Policy*, **29**, 87-102.FAO (2002) Fertilizer Use by Crop  
343 (5<sup>th</sup> Edition), Food and Agriculture Organization of the United Nations, Rome.  
344 Grote U, Craswell E, Vlek P (2005) Nutrient flows in international trade: ecology and  
345 policy issues. *Environmental Science & Policy*, **8**, 439-451.  
346 Herrero M, Havlik P, Valin H *et al.* (2013) Biomass use, production, feed efficiencies,  
347 and greenhouse gas emissions from global livestock systems. *Proceedings of the*  
348 *National Academy of Sciences of the United States of America*, **110**, 20888-20893.  
349 Levington Agriculture (1997) A Report for the European Fertiliser Manufacturers  
350 Association. Levington Agriculture Ltd., Ipswich, UK, 111 pp.  
351 Liu Y, Villalba G, Ayres RU, Schroder H (2008) Global phosphorus flows and  
352 environmental impacts from a consumption perspective. *Journal of Industrial*  
353 *Ecology*, **12**, 229-247.  
354 Ma W, Ma L, Li J *et al.* (2011) Phosphorus flows and use efficiencies in production and  
355 consumption of wheat, rice, and maize in China. *Chemosphere*, **84**, 814-821.  
356 Mishima S, Endo A, Kohyama K (2010) Recent trends in phosphate balance nationally  
357 and by region in Japan. *Nutrient Cycling in Agroecosystems*, **86**, 69-77.  
358 MWPS-18 (1985) Livestock Waste Facilities Handbook. Midwest Plan Service,  
359 University of Missouri, Ames, IA, USA, 112 pp.  
360 OECD Secretariat (1991) National Soil Surface Nutrient Balances, 1985 to 1995.  
361 Explanatory Notes. Table 2 Coefficients to convert livestock numbers into manure  
362 nitrogen quantities from national sources. Organisation for Economic Cooperation

363 and Development, Paris.

364 Ringeval B, Nowak B, Nesme T *et al.* (2014) Contribution of anthropogenic  
365 phosphorus to agricultural soil fertility and food production. *Global*  
366 *Biogeochemical Cycles*, **28**, 743–756.

367 Senthilkumar K, Nesme T, Mollier A *et al.* (2012) Regional-scale phosphorus flows  
368 and budgets within France: the importance of agricultural production systems.  
369 *Nutrient Cycling in Agroecosystems*, **92**, 145-159, doi: 10.1007/s10705-011-9478-  
370 5.

371 Sheldrick W, Syers JK, Lingard J (2003) Contribution of livestock excreta to nutrient  
372 balances. *Nutrient Cycling in Agroecosystems*, **66**, 119-131.

373 Smil V (2000) Phosphorus in the environment: natural flows and human interferences.  
374 *Annual Review of Energy and the Environment*, **25**, 53-88.

375 Suh S, Yee S (2011) Phosphorus use-efficiency of agriculture and food system in the  
376 US. *Chemosphere* **84**, 806-813.

377 USDA-NRCS (2009) Crop Nutrient Tool: Nutrient Content of Crops. United States  
378 Department of Agriculture, Natural Resource Conservation Service, Washington.

379 Waller JC (2010) Byproducts and unusual feedstuffs. *Feedstuffs*, **9**, 18-22.

380 Wang R, Balkanski Y, Boucher O *et al.* (2015) Significant contribution of combustion-  
381 related emissions to the atmospheric phosphorus budget. *Nature Geoscience*, **8**,  
382 48-54.

383 Wang R, Tao S, Balkanski Y *et al.* (2014) Exposure to ambient black carbon derived  
384 from a unique inventory and high resolution model. *Proceedings of the National*

385 *Academy of Sciences of the United States of America*, **111**, 2459-2463.

386

Table SI-1: Global regions and countries

| Eastern and Southern Africa    | Northern Africa | Western and Central Africa   | Eastern Asia                          | Southern and Southeastern Asia | Western and Central Asia | Oceania                  | Europe                 | North America             | The Caribbean and Central America | South America                                |
|--------------------------------|-----------------|------------------------------|---------------------------------------|--------------------------------|--------------------------|--------------------------|------------------------|---------------------------|-----------------------------------|----------------------------------------------|
| Angola                         | Algeria         | Benin                        | China                                 | Bangladesh                     | Afghanistan              | American Samoa           | Albania                | Canada                    | Anguilla                          | Argentina                                    |
| Botswana                       | Burkina Faso    | Burundi                      | Japan                                 | Bhutan                         | Armenia                  | Samoa                    | Andorra                | Greenland                 | Antigua and Barbuda               | Bolivia                                      |
| British Indian Ocean Territory | Chad            | Cameroon                     | Democratic People's Republic of Korea | Brunei Darussalam              | Azerbaijan               | Australia                | Austria                | Mexico                    | Barbuda                           | Brazil                                       |
|                                | Djibouti        | Cabo Verde                   | Republic of Korea                     | India                          | Bahrain                  | Cook Islands             | Belarus                | Saint Pierre and Miquelon | Aruba                             | Chile                                        |
|                                | Egypt           | Central African Republic     | Republic of Korea                     | Cambodia                       | Cyprus                   | Fiji                     | Belgium                | and                       | Bahamas                           | Colombia                                     |
| Comoros                        | Eritrea         | African Republic             | Republic of Korea                     | Indonesia                      | Georgia                  | French Polynesia         | Bosnia and Herzegovina | United States             | Barbados                          | Ecuador                                      |
| Kenya                          | Ethiopia        | Republic of Congo            | Republic of Korea                     | Laos                           | Iran                     | Guam                     | Bulgaria               | States                    | Belize                            | Falkland Islands                             |
| Lesotho                        | Libya           | Congo                        | Republic of Korea                     | Malaysia                       | Iraq                     | Kiribati                 | Croatia                |                           | Bermuda                           | French Guiana                                |
| Madagascar                     | Mali            | Democratic Republic of Congo | Mongolia                              | Maldives                       | Israel                   | Marshall Islands         | Czech Republic         |                           | British Virgin Islands            | Guyana                                       |
| Malawi                         | Mauritania      | Republic of the Congo        |                                       | Myanmar                        | Jordan                   | Islands                  | Denmark                |                           | Islands                           | Paraguay                                     |
| Mauritius                      | Morocco         | the Congo                    |                                       | Nepal                          | Kazakhstan               | Nauru                    | Estonia                |                           | Cayman Islands                    | Peru                                         |
| Mayotte                        | Niger           | Côte d'Ivoire                |                                       | Pakistan                       | Kuwait                   | New Caledonia            | Faroe Islands          |                           | Costa Rica                        | South Georgia and the South Sandwich Islands |
| Mozambique                     | Somalia         | Equatorial Guinea            |                                       | Philippines                    | Kyrgyzstan               | New Zealand              | Finland                |                           | Cuba                              | and the South Sandwich Islands               |
| Namibia                        | Sudan           | Guinea                       |                                       | Singapore                      | Lebanon                  | Niue                     | France                 |                           | Dominica                          |                                              |
| Réunion                        | Tunisia         | Gabon                        |                                       | Sri Lanka                      | Oman                     | Northern Mariana Islands | Germany                |                           | Dominican Republic                | Suriname                                     |
| Seychelles                     | Western Sahara  | Gambia                       |                                       | Thailand                       | Qatar                    | Gibraltar                |                        |                           | El Salvador                       | Uruguay                                      |
| South Africa                   |                 | Ghana                        |                                       | Timor-Leste                    | Saudi Arabia             | Palau                    | Greece                 |                           | Grenada                           | Venezuela                                    |
| Swaziland                      |                 | Guinea-Bissau                |                                       | Vietnam                        | Syrian Arab Republic     | Papua New Guinea         | Hungary                |                           | Guadeloupe                        |                                              |
| Tanzania                       |                 | Guinea-Bissau                |                                       |                                | Republic                 | Guinea                   | Iceland                |                           | Guatemala                         |                                              |
| Uganda                         |                 | Liberia                      |                                       |                                | Tajikistan               | Pitcairn Islands         | Ireland                |                           | Haiti                             |                                              |
| Zambia                         |                 |                              |                                       |                                | Turkey                   |                          |                        |                           |                                   |                                              |

---

|          |              |              |                |               |                   |
|----------|--------------|--------------|----------------|---------------|-------------------|
| Zimbabwe | Nigeria      | Turkmenistan | Samoa          | Italy         | Honduras          |
|          | Rwanda       | n            | Solomon        | Latvia        | Jamaica           |
|          | São Tome and | United Arab  | Islands        | Liechtenstein | Martinique        |
|          | Principe     | Emirates     | Tokelau        | Lithuania     | Montserrat        |
|          | Senegal      | Uzbekistan   | Tonga          | Luxembourg    | Netherlands       |
|          | Sierra Leone | Yemen        | Tuvalu         | Macedonia     | Antilles          |
|          | Saint Helena |              | Vanuatu        | Malta         | Nicaragua         |
|          | Togo         |              | Wallis and     | Moldova       | Panama            |
|          |              |              | Futuna Islands | Monaco        | Puerto Rico       |
|          |              |              |                | Netherlands   | Saint Kitts and   |
|          |              |              |                | Norway        | Nevis             |
|          |              |              |                | Poland        | Saint Lucia       |
|          |              |              |                | Portugal      | Saint Vincent and |
|          |              |              |                | Romania       | the Grenadines    |
|          |              |              |                | Russia        | Trinidad and      |
|          |              |              |                | San Marino    | Tobago            |
|          |              |              |                | Serbia        | Turks and Caicos  |
|          |              |              |                | Montenegro    | Islands           |
|          |              |              |                | Slovakia      |                   |
|          |              |              |                | Slovenia      |                   |
|          |              |              |                | Spain         |                   |
|          |              |              |                | Sweden        |                   |
|          |              |              |                | Switzerland   |                   |
|          |              |              |                | Ukraine       |                   |
|          |              |              |                | United        |                   |
|          |              |              |                | Kingdom       |                   |

---

Table SI-2: Crop categories and their P contents

| Category         | P content (% w/w)                                                                   | Items                                                                                                                                                                                                                                                                                                                                                                                                                                                                                                                                                                                                                                                                                                                                                                                                                                                                                                           |
|------------------|-------------------------------------------------------------------------------------|-----------------------------------------------------------------------------------------------------------------------------------------------------------------------------------------------------------------------------------------------------------------------------------------------------------------------------------------------------------------------------------------------------------------------------------------------------------------------------------------------------------------------------------------------------------------------------------------------------------------------------------------------------------------------------------------------------------------------------------------------------------------------------------------------------------------------------------------------------------------------------------------------------------------|
| Wheat            | 0.38                                                                                | wheat                                                                                                                                                                                                                                                                                                                                                                                                                                                                                                                                                                                                                                                                                                                                                                                                                                                                                                           |
| Rice             | 0.25                                                                                | rice                                                                                                                                                                                                                                                                                                                                                                                                                                                                                                                                                                                                                                                                                                                                                                                                                                                                                                            |
| Maize            | 0.18 (0.09–0.27)                                                                    | maize                                                                                                                                                                                                                                                                                                                                                                                                                                                                                                                                                                                                                                                                                                                                                                                                                                                                                                           |
| Other cereals    | 0.31 (0.29–0.34)                                                                    | rye, oats, millet, sorghum, triticale, canary seeds, buckwheat, quinoa, fonio, popcorn, mixed grains, cereals nes                                                                                                                                                                                                                                                                                                                                                                                                                                                                                                                                                                                                                                                                                                                                                                                               |
| Soybeans         | 0.60                                                                                | soybeans                                                                                                                                                                                                                                                                                                                                                                                                                                                                                                                                                                                                                                                                                                                                                                                                                                                                                                        |
| Oil palms        | 0.54                                                                                | palm oil and kernels                                                                                                                                                                                                                                                                                                                                                                                                                                                                                                                                                                                                                                                                                                                                                                                                                                                                                            |
| Other oil crops  | 0.06 (0.04–0.08)                                                                    | olives, sunflower seeds, sesame seeds, seed cotton, cottonseed, linseed, groundnuts with shells, oilseed rape, coconuts, castor oil seeds, tung nuts, safflower seeds, mustard seeds,                                                                                                                                                                                                                                                                                                                                                                                                                                                                                                                                                                                                                                                                                                                           |
|                  | 0.47 (0.32–0.62)                                                                    | poppy seeds, oilseeds nes, melon seeds, hemp seeds, tallotree seeds, karite nuts (sheanuts), kapok fruit, jojoba seeds                                                                                                                                                                                                                                                                                                                                                                                                                                                                                                                                                                                                                                                                                                                                                                                          |
| Sugar crops      | 0.05 (0.04–0.06)                                                                    | sugar beets, sugar cane, sugar crops nes                                                                                                                                                                                                                                                                                                                                                                                                                                                                                                                                                                                                                                                                                                                                                                                                                                                                        |
| Fiber            | 0.67                                                                                | seed cotton, cotton lint, other bast fibers, sisal, flax and tow fiber, fiber crops nes, jute, ramie, hemp tow waste, agave fibers nes, manila fiber (abaca), kapok fruit                                                                                                                                                                                                                                                                                                                                                                                                                                                                                                                                                                                                                                                                                                                                       |
| Roots and tubers | 0.07 (0.04–0.09)                                                                    | potatoes, cassava, taro (cocoyam), yams, sweet potatoes, yautia (cocoyam), roots and tubers nes                                                                                                                                                                                                                                                                                                                                                                                                                                                                                                                                                                                                                                                                                                                                                                                                                 |
| Vegetables       | 0.06 (0.05–0.07)                                                                    | cabbages and other brassicas, tomatoes, cauliflowers and broccoli, cucumbers and gherkins, dry onions, garlic, green peas, carrots and turnips, fresh vegetables nes, watermelons, other melons (including cantaloupes), spinach, pumpkins, squash and gourds, eggplants (aubergines), chili and green peppers, onions and green shallots, leeks and other alliaceous vegetables, green beans, leguminous vegetables nes, okra, mushrooms and truffles, artichokes, maize greens, asparagus, string beans, lettuce and chicory, cassava leaves                                                                                                                                                                                                                                                                                                                                                                  |
| Fruit            | 0.02 (0.01–0.04)                                                                    | Apples, pears, apricots, cherries, peaches and nectarines, plums and sloes, stone fruits nes, berries nes, grapes, tropical fresh fruit nes, fresh fruit nes, oranges, citrus fruit nes, figs, quinces, sour cherries, carobs, tangerines, mandarins, clementines, satsumas, lemons and limes, grapefruit (incl. pomelos), dates, bananas, pineapples, mangoes, mangosteens, guavas, strawberries, avocados, papayas, raspberries, currants, persimmons, kiwi fruit, gooseberries, plantains, cashewapple, blueberries, cranberries, pome fruits nes                                                                                                                                                                                                                                                                                                                                                            |
| Other crops      | 0.43 for pulses, 0.41 for nuts, 0.03 for stimulants and spices, and 0.15 for others | dry beans, dry peas, lentils, forage and silage (maize, grasses nes, alfalfa, clover, sorghum, green oilseeds, legumes, rye grass), forage products, vegetables and root fodder, tobacco (unmanufactured), pulses nes, almonds with shells, walnuts with shells, pistachios, nuts nes, anise, badian, fennel, coriander, broad beans, dry horse beans, vetches, chestnuts, hops, spices nes, chick peas, groundnuts with shells, beets for fodder, chilies and dry peppers, cocoa beans, coffee greens, lupins, tea, maté, peppermint, pigeon peas, natural rubber, Brazil nuts with shells, nutmeg mace, cardamoms, areca nuts, ginger, dry cow peas, bambara beans, kola nuts, hazelnuts with shells, pepper ( <i>Piper</i> spp.), natural gums, cinnamon (canella), cloves, chicory roots, cabbage for fodder, teas nes, carrots for fodder, vanilla, dried pyrethrum, swedes for fodder, turnips for fodder |

393  
394

Table SI-3: P:N ratios in manure and the P contents of livestock and their products.

| Livestock and products | P:N ratio for livestock manure | P content of livestock and their products (% w/w) |
|------------------------|--------------------------------|---------------------------------------------------|
| Buffaloes              | 0.18 (0.13-0.24)               | 0.21                                              |
| Cattle, dairy          | 0.18 (0.13-0.24)               | 0.21                                              |
| Cattle, non-dairy      | 0.18 (0.13-0.24)               | 0.21                                              |
| Sheep                  | 0.15 (0.09-0.23)               | 0.16                                              |
| Goats                  | 0.15 (0.09-0.23)               | 0.16                                              |
| Swine, market          | 0.28 (0.23-0.35)               | 0.56                                              |
| Swine, breeding        | 0.28 (0.23-0.35)               | 0.56                                              |
| Chickens, layers       | 0.24 (0.13-0.35)               | 0.15                                              |
| Chickens, broilers     | 0.24 (0.13-0.35)               | 0.15                                              |
| Turkeys                | 0.25 (0.21-0.29)               | 0.15                                              |
| Horses                 | 0.19 (0.18-0.21)               | 0.17                                              |
| Donkeys                | 0.19 (0.18-0.21)               | 0.17                                              |
| Mules                  | 0.19 (0.18-0.22)               | 0.17                                              |
| Camels                 | 0.19 (0.18-0.23)               | 0.17                                              |
| Ducks                  | 0.25 (0.21-0.29)               | 0.15                                              |
| Llamas                 | 0.19 (0.18-0.25)               | 0.17                                              |
| Eggs                   | -                              | 0.26                                              |
| Milk                   | -                              | 0.093                                             |

395  
396  
397  
398  
399  
400  
401  
402  
403  
404  
405  
406  
407  
408  
409  
410  
411

Source:

1. ASAE (2005) Manure production and characteristics. Report D384.2, American Society of Agricultural Engineers, St. Joseph, MI, USA.
2. COMIFER (2007) Teneur en P, K et Mg des organes végétaux récoltés pour les cultures de plein champ et les principaux fourrages. Comité Français d'Étude et de Développement de la Fertilisation Raisonné, Paris. (in French)
3. Levington Agriculture (1997) A Report for the European Fertiliser Manufacturers Association. Levington Agriculture Ltd., Ipswich, UK, 111 pp.
4. MWPS-18 (1985) Livestock Waste Facilities Handbook. Midwest Plan Service, University of Missouri, Ames, IA, USA, 112 pp.
5. OECD Secretariat (1991) National Soil Surface Nutrient Balances, 1985 to 1995. Explanatory Notes. Table 2 Coefficients to convert livestock numbers into manure nitrogen quantities from national sources. Organisation for Economic Cooperation and Development, Paris.
6. Sheldrick W, Syers JK, Lingard J (2003) Contribution of livestock excreta to nutrient balances. Nutrient Cycling in Agroecosystems, 66, 119-131.



Table SI-4: Equations and data sources used in this study

| Pool       | Flow                        | Abbreviation     | Method                                             | Period    | Data Source                            | Parameters                  |
|------------|-----------------------------|------------------|----------------------------------------------------|-----------|----------------------------------------|-----------------------------|
| Phosphate  | Phosphate acid              | $P_{pa}$         | $P_{pa} = P_{P2O5\%} \times PA$                    | 2002–2010 | Phosphate acid production from IFA     | P fraction of P in $P_2O_5$ |
|            | Fertilizer                  | $P_{fer}$        | $P_{fer} = P_{P2O5\%} \times Fer$                  | 2002–2010 | Fertilizer consumption from FAO        | P fraction of P in $P_2O_5$ |
|            | Feed additives              | $P_{feed-add}$   | $P_{feed-add} = 8\% \times P_{pa}$                 | 2002–2010 | –                                      | –                           |
|            | Detergent and other         | $P_{det}$        | $P_{det} = P_{pa} - P_{fer} - P_{feed-add}$        | 2002–2010 | –                                      | –                           |
| Atmosphere | Deposition to cropland      | $P_{dep-crop}$   | PKU-FUEL Model                                     | 2007      | –                                      | –                           |
|            | Deposition to pasture grass | $P_{dep-grass}$  | PKU-FUEL Model                                     | 2007      | –                                      | –                           |
|            | Cropland field burning      | $P_{crop-bur}$   | PKU-FUEL Model                                     | 2007      | –                                      | –                           |
|            | Bioenergy emission          | $P_{bioener}$    | PKU-FUEL Model                                     | 2007      | –                                      | –                           |
| Cropland   | Crop production             | $P_{crop}$       | $P_{crop} = Crop \times P_{crop\%}$                | 2002–2010 | Crop production from FAO               | P fraction of crops         |
|            | Crops as food               | $P_{crop-food}$  | $P_{crop-food} = Crop-Food \times P_{crop\%}$      | 2002–2010 | Crop production as food from FAO       | P fraction of crops         |
|            | Crops as feed               | $P_{crop-feed}$  | $P_{crop-feed} = Crop-Feed \times P_{crop\%}$      | 2002–2010 | Crop production as feed from FAO       | P fraction of crops         |
|            | Crops as seed               | $P_{crop-seed}$  | $P_{crop-seed} = Crop-Seed \times P_{crop\%}$      | 2002–2010 | Crop production as seed from FAO       | P fraction of crops         |
|            | Crops as processing         | $P_{crop-pro}$   | $P_{crop-pro} = Crop-Processing \times P_{crop\%}$ | 2002–2010 | Crop production as processing from FAO | P fraction of crops         |
|            | Crops as waste              | $P_{crop-waste}$ | $P_{crop-waste} = Crop-Waste \times P_{crop\%}$    | 2002–2010 | Crop production as waste from FAO      | P fraction of crops         |
|            | Crops as other uses         | $P_{crop-oth}$   | $P_{crop-oth} = Crop-Other Use \times P_{crop\%}$  | 2002–2010 | Crop production as other use from FAO  | P fraction of crops         |

|           |                                    |                    |                                                                                                                                                                         |           |                                                        |                                                       |
|-----------|------------------------------------|--------------------|-------------------------------------------------------------------------------------------------------------------------------------------------------------------------|-----------|--------------------------------------------------------|-------------------------------------------------------|
|           | Crop residues recycled to cropland | $P_{res-ret}$      | $P_{res-ret} = Residues-Return \times P_{crop\%}$                                                                                                                       | 2002–2010 | Crop residues production returned to cropland from FAO | P fraction of crop residues                           |
|           | Total crop residues                | $P_{crop-res}$     | $P_{crop-res} = P_{res-ret}/50\%$                                                                                                                                       | 2002–2010 | –                                                      | –                                                     |
|           | Crop residues as feed              | $P_{res-feed}$     | $P_{res-feed} = P_{crop-res} \times 25\%$                                                                                                                               | 2002–2010 | –                                                      | –                                                     |
|           | Crop residues to human             | $P_{res-hum}$      | $P_{res-hum} = P_{crop-res} - P_{res-ret} - P_{res-feed} - P_{crop-}$<br>$bur$                                                                                          | 2002–2010 | –                                                      | –                                                     |
|           | Cropland runoff                    | $P_{run-crop}$     | $P_{run-crop} = 12.5\% \times (P_{fer-crop} + P_{dep-crop} + P_{livman-crop} + P_{man-hum} + P_{res-ret})$                                                              | 2002–2010 | –                                                      | –                                                     |
| Pasture   | Grass as feed                      | $P_{grass}$        | ORCHIDEE Model                                                                                                                                                          | 2002–2010 | –                                                      | P fraction of grass and forage                        |
|           | Pasture runoff                     | $P_{run-grass}$    | $P_{run-crop} = 12.5\% \times (P_{fer-pas} + P_{dep-pas} + P_{livman-pas})$                                                                                             | 2002–2010 | –                                                      | –                                                     |
| Livestock | Manure to cropland                 | $P_{manliv-crop}$  | $P_{manliv-crop} = N_{Manure-Crop} \times P\%/N\%$                                                                                                                      | 2002–2010 | Livestock manure production to cropland from FAO       | P fraction of livestock manure to CROPLAND            |
|           | Manure to pasture                  | $P_{manliv-grass}$ | $P_{manliv-pas} = N_{Manure-grass} \times P\%/N\%$                                                                                                                      | 2002–2010 | Livestock manure production to pasture from FAO        | P fraction of livestock manure to pasture             |
|           | Manure as waste                    | $P_{man-waste}$    | $P_{manliv-crop} = N_{Manure-waste} \times P\%/N\%$                                                                                                                     | 2002–2010 | Livestock manure production as wastes from FAO         | P fraction of livestock manure as waste               |
|           | Meat                               | $P_{meat}$         | $P_{meat} = Meat \times P_{meat}\%$                                                                                                                                     | 2002–2010 | Meat production from FAO                               | P fraction of meat                                    |
|           | Eggs                               | $P_{egg}$          | $P_{egg} = Eggs \times P_{egg}\%$                                                                                                                                       | 2002–2010 | Egg production from FAO                                | P fraction of egg                                     |
|           | Milk                               | $P_{milk}$         | $P_{milk} = Milk \times P_{milk}\%$                                                                                                                                     | 2002–2010 | Milk production from FAO                               | P fraction of milk                                    |
|           | Feed from human food waste         | $P_{feed}$         | $P_{pro-feed} = (P_{meat} + P_{egg} + P_{milk} + P_{manliv-crop} + P_{manliv-gpas} + P_{man-pas}) - (P_{fee-add} + P_{res-feed} + P_{crop-feed} + P_{grass} + P_{for})$ | 2002–2010 | –                                                      | –                                                     |
| Humans    | Human excreta as manure to crops   | $P_{man-hum}$      | $P_{man-hum} = Excreta-Human \times (70\% \times Population_{rural})$                                                                                                   | 2002–2010 | Rural and urban population from FAO                    | P fraction of human excreta, human excreta production |

|                   |               |                                                              |                                     |           |   |   |
|-------------------|---------------|--------------------------------------------------------------|-------------------------------------|-----------|---|---|
|                   |               |                                                              | $+ 30\% \times Population_{urban}$  |           |   |   |
| Human excreta as  | $P_{exchum-}$ | $P_{exchum-waste} = Excreta-Human \times (30\% \times$       |                                     | 2002–2010 | – | – |
| manure wasted     | waste         | $Population_{rural}$                                         |                                     |           |   |   |
|                   |               |                                                              | $+ 70\% \times Population_{urban})$ |           |   |   |
| Waste from humans | $P_{waste-}$  | $P_{waste-hum} = [(P_{crop} - P_{crop-seed}) + (P_{meat} +$  |                                     | 2002–2010 | – | – |
|                   | hum           | $P_{egg} + P_{milk}) + P_{det}] - P_{man-hum} - P_{bioener}$ |                                     |           |   |   |

413 Source:

- 414 1. IFA, <http://www.fertilizer.org/Statistics>
- 415 2. FAO, <http://www.fao.org/faostat/en/#home>
- 416 3. Antikainen R, Lemola R, Nousiainen JI et al. (2005) Stocks and flows of nitrogen and phosphorus in the Finnish food production and consumption system. *Agriculture, Ecosystems and*
- 417 *Environment*, 107, 287-305.
- 418 4. ASAE (2005) Manure production and characteristics. Report D384.2, American Society of Agricultural Engineers, St. Joseph, MI, USA.
- 419 5. COMIFER (2007) Teneur en P, K et Mg des organes végétaux récoltés pour les cultures de plein champ et les principaux fourrages. Comité Français d'Étude et de Développement de la
- 420 Fertilisation Raisonné, Paris. (in French)
- 421 6. Herrero M, Havlik P, Valin H et al. (2013) Biomass use, production, feed efficiencies, and greenhouse gas emissions from global livestock systems. *Proceedings of the National Academy of*
- 422 *Sciences of the United States of America*, 110, 20888-20893.
- 423 7. Levington Agriculture (1997) A Report for the European Fertiliser Manufacturers Association. Levington Agriculture Ltd., Ipswich, UK, 111 pp.
- 424 8. Liu Y, Villalba G, Ayres RU, Schroder H (2008) Global phosphorus flows and environmental impacts from a consumption perspective. *Journal of Industrial Ecology*, 12, 229-247.
- 425 9. MWPS-18 (1985) Livestock Waste Facilities Handbook. Midwest Plan Service, University of Missouri, Ames, IA, USA, 112 pp.
- 426 10. OECD Secretariat (1991) National Soil Surface Nutrient Balances, 1985 to 1995. Explanatory Notes. Table 2 Coefficients to convert livestock numbers into manure nitrogen quantities from
- 427 national sources. Organisation for Economic Cooperation and Development, Paris.
- 428 11. USDA-NRCS (2009) Crop Nutrient Tool: Nutrient Content of Crops. United States Department of Agriculture, Natural Resource Conservation Service, Washington.
- 429 12. Waller JC (2010) Byproducts and unusual feedstuffs. *Feedstuffs*, 9, 18-22.
- 430 13. Wang R, Balkanski Y, Boucher O et al. (2015) Significant contribution of combustion-related emissions to the atmospheric phosphorus budget. *Nature Geoscience*, 8, 48-54.
- 431 14. Wang R, Tao S, Balkanski Y et al. (2014) Exposure to ambient black carbon derived from a unique inventory and high resolution model. *Proceedings of the National Academy of Sciences*
- 432 *of the United States of America*, 111, 2459-2463.

433  
434

Table SI-5: Ranges of cropland P fluxes used in the uncertainty analysis and for comparison with earlier studies.

|                   |                              | Total input (Tg P yr <sup>-1</sup> ) |                                    |            | Total output (Tg P yr <sup>-1</sup> ) |                         |                    |
|-------------------|------------------------------|--------------------------------------|------------------------------------|------------|---------------------------------------|-------------------------|--------------------|
| Fertilizer inputs | Livestock manure to cropland | Human sewage sludge to cropland      | Recycled crop residues to cropland | Deposition | Harvested crops                       | Harvested crop residues | Leaching or runoff |
| 13.7–15.0         | 6.0–8.0                      | 1.3–1.5                              | 1.0–3.5                            | 0.6–1.0    | 8.2–12.3                              | 3.8–6.7                 | 3.2–4.0            |

435  
436  
437  
438

Note: For Research, the global flows and budget was in the year 2000.  
Source: 1. Liu et al., 2008; 2. Smil, 2000; 3. Cordell et al., 2009; 4. MacDonald et al., 2011; 5. Bouwman et al., 2009; 6. Bouwman et al., 2011.

439

440

441 Table SI-6: Cropland total PUE and PUE (excluding residues for cropland and manure  
 442 for livestock) at the global and regional levels.

|                                | Cropland |           |                | Total<br>PUE : | Livestock     |                     |
|--------------------------------|----------|-----------|----------------|----------------|---------------|---------------------|
|                                | PUE      | Total PUE | Soil P balance |                | Livestock PUE | Livestock total PUE |
|                                |          |           |                | ratio          |               |                     |
| World                          | 0.46     | 0.76      | 4.68           | 1.65           | 0.06          | 0.83                |
| Eastern and Southern Africa    | 0.80     | 1.26      | -1.03          | 1.58           | 0.02          | 0.92                |
| Northern Africa                | 0.84     | 1.48      | -1.48          | 1.76           | 0.02          | 0.95                |
| Western and Central Africa     | 1.51     | 2.28      | -2.72          | 1.51           | 0.01          | 0.92                |
| Eastern Asia                   | 0.27     | 0.44      | 23.45          | 1.63           | 0.08          | 0.81                |
| Southern and Southeastern Asia | 0.43     | 0.77      | 4.14           | 1.79           | 0.05          | 0.78                |
| Western and Central Asia       | 0.64     | 1.09      | 0.22           | 1.70           | 0.04          | 0.69                |
| Oceania                        | 0.31     | 0.51      | 5.17           | 1.65           | 0.04          | 0.93                |
| Europe                         | 0.54     | 0.88      | 2.78           | 1.63           | 0.09          | 0.78                |
| North America                  | 0.57     | 0.99      | 1.46           | 1.74           | 0.08          | 0.89                |
| Caribbean and Central America  | 0.53     | 0.69      | 3.79           | 1.30           | 0.03          | 0.78                |
| South America                  | 0.63     | 0.88      | 2.25           | 1.40           | 0.03          | 0.84                |

443

444

445

446

447

448

449 Table SI-7: Cropland total PUE and cropland PUE (excluding residues) for different  
450 crops

|                  |                 | Cropland tota PUE | Croplandl PUE | Cropland PUE : cropland total PUE ratio |
|------------------|-----------------|-------------------|---------------|-----------------------------------------|
| Cereals          | Wheat           | 0.55              | 1.06          | 1.93                                    |
|                  | Rice            | 0.33              | 0.90          | 2.73                                    |
|                  | Maize           | 0.36              | 0.90          | 2.50                                    |
|                  | Other cereals   | 0.70              | 1.43          | 2.04                                    |
| Oil crops        | Soybean         | 0.73              | 0.96          | 1.32                                    |
|                  | Oil palm        | 0.24              | 0.24          | 1.0                                     |
|                  | Other oil crops | 0.60              | 0.60          | 1.0                                     |
| Sugar crops      |                 | 0.83              | 0.83          | 1.0                                     |
| Fiber            |                 | 0.19              | 0.19          | 1.0                                     |
| Roots and tubers |                 | 0.54              | 0.69          | 1.28                                    |
| Fruits           |                 | 0.10              | 0.10          | 1.0                                     |
| Vegetables       |                 | 0.25              | 0.28          | 1.12                                    |
| Other crops      |                 | 0.52              | 0.52          | 1.0                                     |

451

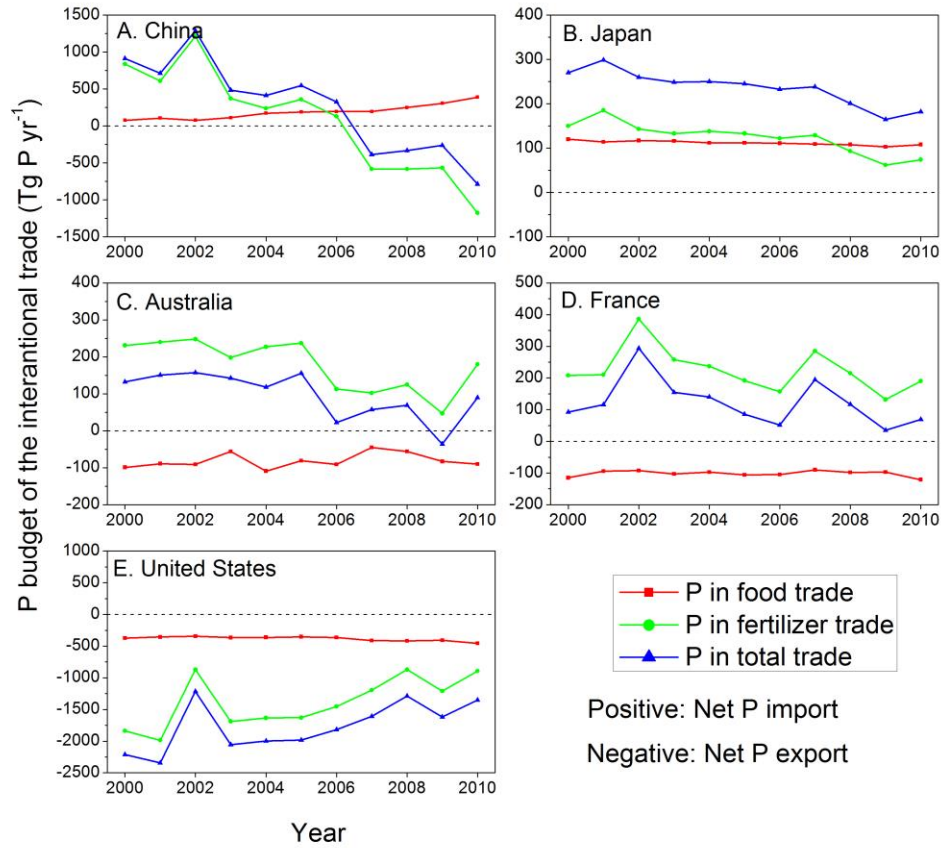

453

454 Figure SI-1: Flows of P in international trade for (A) China, (B) Japan, (C) Australia,  
 455 (D) France, and (E) the United States from 2000 to 2010. Positive values represent net  
 456 imports; negative values represent net exports.

457

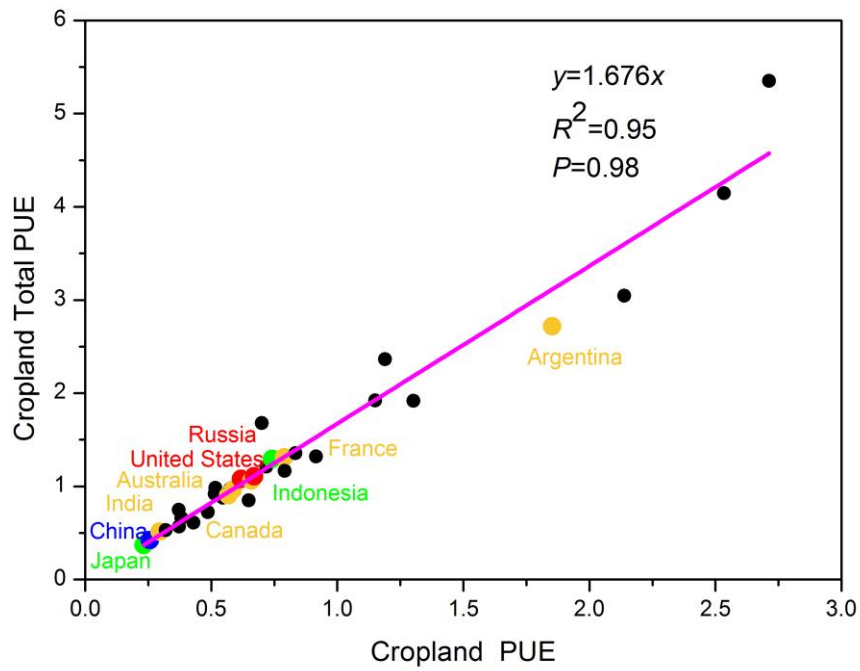

458

459 Figure SI-2: The relationship between cropland total PUE (harvested crops + residues)  
 460 and cropland PUE (harvested crops, excluding residues) for 35 large countries.  
 461



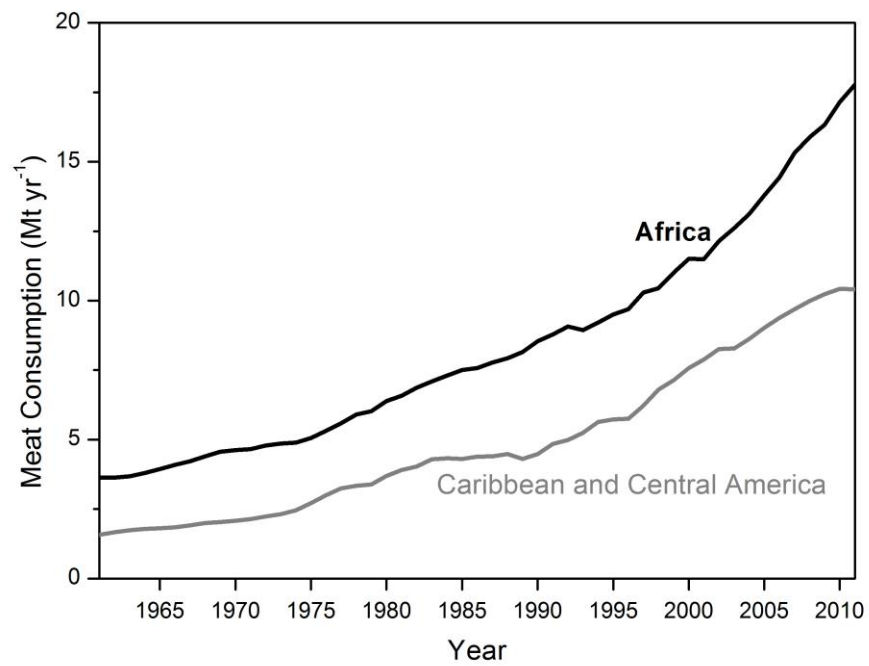

463

464 Figure SI-3: Changes in meat consumption in Africa and in the Caribbean and Central  
465 America region between 1961 and 2011

466
